# Supplementary material
Source: ML conference proceedings conference paper supplement (https://openaccess.thecvf.com/content/CVPR2021/html/Perrett_Temporal-Relational_CrossTransformers_for_CVPR_2021_paper.html)
Supplement: Supplementary file 1 [file Perrett_Temporal-Relational_CrossTransformers_for_CVPR_2021_supplemental.pdf]

# Temporal-Relational CrossTransformers for Few-Shot Action Recognition

## Supplementary Material

Toby Perrett    Alessandro Masullo    Tilo Burghardt    Majid Mirmehdi    Dima Damen  
<first>.<last>@bristol.ac.uk    Department of Computer Science, University of Bristol, UK

### X-Shot results

In the main paper, we introduced Temporal-Relational CrossTransformers (TRX) for few-shot action recognition. They are designed specifically for  $K$ -shot problems where  $K > 1$ , as TRX is able to match sub-sequences from the query against sub-sequences from multiple support set videos.

Table 1 in the main paper shows results on the standard 5-way 5-shot benchmarks on Kinetics [3], Something-Something V2 (SSv2) [4], HMDB51 [5] and UCF101 [6]. For completeness we also provide 1-, 2-, 3-, 4- and 5-shot results for TRX with  $\Omega=\{1\}$  (i.e. frame-to-frame comparisons) and  $\Omega=\{2, 3\}$  (i.e. pair and triplet comparisons) on the large-scale datasets Kinetics and SSv2. These are in Table 1 in this supplementary, where we also list results from all other works which provide these scores.

For 1-shot, in Kinetics, TRX performs similarly to recent few-shot action-recognition methods [8, 1, 7], but these are all outperformed by OTAM [2]. OTAM works by finding a strict alignment between the query and single support set video per class. It does not scale as well as TRX when  $K > 1$ , shown by TRX performing better on the 5-shot benchmark. This is because TRX is able to match query sub-sequences against similar sub-sequences in the support set, and importantly ignore sub-sequences (or whole videos) which are not as useful. Compared to the strict alignment in OTAM [2], where the full video is considered in the alignment, TRX can exploit several sub-sequences from the same video, ignoring any distractors. Despite not being as well suited to 1-shot problems, on SSv2 TRX performs similarly to OTAM. 2-shot TRX even outperforms 5-shot OTAM. Table 1 again highlights the importance of tuples, shown in the main paper, where TRX with  $\Omega=\{2, 3\}$  consistently outperforms  $\Omega=\{1\}$ .

Figure 5 in the main paper shows how TRX scales on SSv2 compared to CMN [8, 9], which also provides X-shot results ( $1 \leq X \leq 5$ ). The equivalent graph for Kinetics is shown in Fig. 1 here. This confirms TRX scales better as the shot increases. There is less of a difference between TRX with  $\Omega=\{1\}$  and  $\Omega=\{2, 3\}$ , as Kinetics requires less tem-

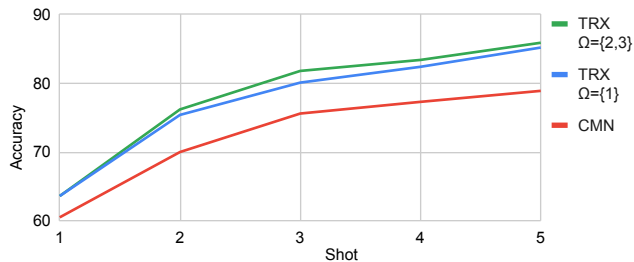

Figure 1: Comparing CMN [9] results to TRX for X-shot 5-way, for  $1 \leq X \leq 5$  on Kinetics. TRX benefits from increasing the number of videos in the support set, both for  $\Omega=\{1\}$  and  $\Omega=\{2, 3\}$ .

poral knowledge to discriminate between the classes than SSv2 (ablated in Sec. 4.3.1 and 4.3.2 in the main paper).

### The impact of positional encoding

TRX adds positional encodings to the individual frame representations before concatenating them into tuples. Table 2 shows that adding positional encodings improves SSv2 for both single frames and higher-order tuples (by +0.3% and +0.6% respectively). For Kinetics, performance stays the same as single frames and improves slightly with tuples (+0.4%) for the proposed model. Overall, positional encoding improves the results marginally for TRX.

### References

- [1] Mina Bishay, Georgios Zoumpourlis, and Ioannis Patras. TARN: Temporal Attentive Relation Network for Few-Shot and Zero-Shot Action Recognition. In *British Machine Vision Conference*, 2019. 1, 2
- [2] Kaidi Cao, Jingwei Ji, Zhangjie Cao, Chien-Yi Chang, and Juan Carlos Niebles. Few-Shot Video Classification via Temporal Alignment. In *Computer Vision and Pattern Recognition*, 2020. 1, 2
- [3] Joao Carreira and Andrew Zisserman. Quo Vadis, Action Recognition? A New Model and the Kinetics Dataset. *Computer Vision and Pattern Recognition*, 2017. 1
- [4] Raghav Goyal, Vincent Michalski, Joanna Materzy, Susanne Westphal, Heuna Kim, Valentin Haanel, Peter Yianilos, Moritz Mueller-freitag, Florian Hoppe, Christian Thureau,

| Dataset           | Method                       | Shot        |             |             |             |             |
|-------------------|------------------------------|-------------|-------------|-------------|-------------|-------------|
|                   |                              | 1           | 2           | 3           | 4           | 5           |
| Kinetics          | CMN [8]                      | 60.5        | -           | -           | -           | 78.9        |
|                   | CMN-J [9]                    | 60.5        | 70.0        | 75.6        | 77.3        | 78.9        |
|                   | TARN [1]                     | 64.8        | -           | -           | -           | 78.5        |
|                   | ARN [7]                      | 63.7        | -           | -           | -           | 82.4        |
|                   | OTAM [2]                     | <b>73.0</b> | -           | -           | -           | 85.8        |
|                   | Ours - TRX $\Omega=\{1\}$    | 63.6        | 75.4        | 80.1        | 82.4        | 85.2        |
|                   | Ours - TRX $\Omega=\{2, 3\}$ | 63.6        | <b>76.2</b> | <b>81.8</b> | <b>83.4</b> | <b>85.9</b> |
| SSv2*             | CMN-J [9]                    | <b>36.2</b> | 42.1        | 44.6        | 47.0        | 48.8        |
|                   | Ours - TRX $\Omega=\{1\}$    | 34.9        | 43.4        | 47.6        | 50.9        | 53.3        |
|                   | Ours - TRX $\Omega=\{2, 3\}$ | 36.0        | <b>46.0</b> | <b>51.9</b> | <b>54.9</b> | <b>59.1</b> |
| SSv2 <sup>†</sup> | OTAM [2]                     | <b>42.8</b> | -           | -           | -           | 52.3        |
|                   | Ours - TRX $\Omega=\{1\}$    | 38.8        | 49.7        | 54.4        | 58.0        | 60.6        |
|                   | Ours - TRX $\Omega=\{2, 3\}$ | 42.0        | <b>53.1</b> | <b>57.6</b> | <b>61.1</b> | <b>64.6</b> |

Table 1: Comparison to few-shot video works on Kinetics (split from [9]) and Something-Something V2 (SSv2) (<sup>†</sup>: split from [9] \*: split from [2]). Results are reported as the shot, *i.e.* number of support set videos per class, increases from 1 to 5. -: Results not available in published works.

| Method            | Positional Encoding | Kinetics    | SSv2 <sup>†</sup> |
|-------------------|---------------------|-------------|-------------------|
| $\Omega=\{1\}$    | ×                   | 85.2        | 53.0              |
| $\Omega=\{1\}$    | ✓                   | 85.2        | 53.3              |
| $\Omega=\{2, 3\}$ | ×                   | 85.5        | 58.5              |
| $\Omega=\{2, 3\}$ | ✓                   | <b>85.9</b> | <b>59.1</b>       |

Table 2: The importance of incorporating positional encoding for single frames and the proposed model  $\Omega=\{2, 3\}$ .

Ingo Bax, and Roland Memisevic. The ‘‘Something Something’’ Video Database for Learning and Evaluating Visual Common Sense. In *International Conference on Computer Vision*, 2017. 1

- [5] H Kuehne, T Serre, H Jhuang, E Garrote, T Poggio, and T Serre. HMDB: A large video database for human motion recognition. In *International Conference on Computer Vision*, nov 2011. 1
- [6] Khurram Soomro, Amir Roshan Zamir, and Mubarak Shah. UCF101: A Dataset of 101 Human Actions Classes From Videos in The Wild. *arXiv*, 2012. 1
- [7] Hongguang Zhang, Li Zhang, Xiaojuan Qi, Hongdong Li, Philip H S Torr, and Piotr Koniusz. Few-shot Action Recognition with Permutation-invariant Attention. In *European Conference on Computer Vision*, 2020. 1, 2
- [8] Linchao Zhu and Yi Yang. Compound Memory Networks for Few-Shot Video Classification. In *European Conference on Computer Vision*, 2018. 1, 2
- [9] Linchao Zhu and Yi Yang. Label Independent Memory for Semi-Supervised Few-shot Video Classification. *Transactions on Pattern Analysis and Machine Intelligence*, 14(8), 2020. 1, 2
